# Supplementary material
Source: publisher figshare collection journal article supplement (https://diabetesjournals.figshare.com/ndownloader/files/34106681)
Supplement: Supplementary file 1 [file 34106681]

**Supplemental Table 1. Patient characteristics in covariates before propensity score matching in the HDHP and no deductible group**

|                                               |                    | Total  |       | HDHP  |       | No Deductible |       |
|-----------------------------------------------|--------------------|--------|-------|-------|-------|---------------|-------|
|                                               | Total              | 67,755 |       | 8,184 |       | 59,571        |       |
| Age                                           | 18-<45             | 12,576 | 18.6% | 1,517 | 18.5% | 11,059        | 18.6% |
|                                               | 45-<50             | 10,001 | 14.8% | 1,193 | 14.6% | 8,808         | 14.8% |
|                                               | 50-<55             | 15,029 | 22.2% | 1,897 | 23.2% | 13,132        | 22.0% |
|                                               | 55-<60             | 18,342 | 27.1% | 2,176 | 26.6% | 16,166        | 27.1% |
|                                               | 60-<65             | 11,807 | 17.4% | 1,401 | 17.1% | 10,406        | 17.5% |
| Gender                                        | Male               | 37,516 | 55.5% | 4,872 | 59.5% | 32,644        | 54.8% |
|                                               | Female             | 30,239 | 44.6% | 3,312 | 40.5% | 26,927        | 45.2% |
| Neighborhood SES*                             | Non-low            | 48,705 | 71.9% | 5,597 | 68.4% | 43,108        | 72.4% |
|                                               | Low                | 17,551 | 25.9% | 2,333 | 28.5% | 15,218        | 25.5% |
|                                               | Unknown            | 1,499  | 2.2%  | 254   | 3.1%  | 1,245         | 2.1%  |
| Race (self reported)                          | White              | 22,715 | 33.5% | 2,899 | 35.4% | 19,816        | 33.3% |
|                                               | Black              | 7,452  | 11.0% | 384   | 4.7%  | 7,068         | 11.9% |
|                                               | Hispanic           | 17,913 | 26.4% | 2,508 | 30.6% | 15,405        | 25.9% |
|                                               | Asian              | 18,082 | 26.7% | 2,224 | 27.2% | 15,858        | 26.6% |
|                                               | Other              | 1,593  | 2.4%  | 169   | 2.1%  | 1,424         | 2.4%  |
| New member to KPNC†                           | No                 | 66,181 | 97.7% | 7,815 | 95.5% | 58,366        | 98.0% |
|                                               | Yes                | 1,574  | 2.3%  | 369   | 4.5%  | 1,205         | 2.0%  |
| Insurance type                                | Employer-sponsored | 64,339 | 95.0% | 5,788 | 70.7% | 58,551        | 98.3% |
|                                               | Individual         | 3,416  | 5.0%  | 2,396 | 29.3% | 1,020         | 1.7%  |
| English as a primary language (self reported) | No                 | 8,232  | 12.1% | 1,761 | 21.5% | 6,471         | 10.9% |
|                                               | Yes                | 59,523 | 87.9% | 6,423 | 78.5% | 53,100        | 89.1% |
| Baseline Insulin prescription (%)             | No                 | 48,519 | 71.6% | 6,220 | 76.0% | 42,299        | 71.0% |
|                                               | Yes                | 19,236 | 28.4% | 1,964 | 24.0% | 17,272        | 29.0% |
| Baseline number of prescriptions              | Mean               |        | 5.08  |       | 4.11  |               | 5.21  |

\*SES calculated based on zip code and low SES defined as 20% or more of the residents having household incomes below the federal poverty level or 25% or more of the residents > 25 years old having a high school education or less in the census block group, based on the 2010 US census

†New Member: Defined by no prior KPNC insurance plan prior to the start of the 2-year observation period.

**Supplemental Table 2: Sensitivity analysis evaluating for outcome variables among all subjects before adjusted propensity-score matching**

| Outcome                                      | HDHP  | No Deductible | p-value |
|----------------------------------------------|-------|---------------|---------|
| N                                            | 8,184 | 59,571        |         |
| <b>Participation in visits with Provider</b> |       |               |         |
| Office visit (mean)                          | 4.57  | 5.22          | <0.001  |
| Phone visit (mean)                           | 2.70  | 2.61          | 0.642   |
| <b>Medication adherence</b>                  |       |               |         |
| Oral Med adherence (%)                       | 58.06 | 59.12         | 0.153   |
| <b>Monitoring adherence</b>                  |       |               |         |
| HbA1c test adherence (%)                     | 46.79 | 51.75         | <.0001  |
| BP measurement adherence (%)                 | 94.00 | 95.19         | <.0001  |
| Retinopathy screening adherence (%)          | 50.63 | 54.00         | <.0001  |

We used logistic regression model for binary outcomes and negative binomial regression model for counts (office visit, phone visit) adjusted for the potential confounders which we included in the propensity score calculation.

Covariate-adjusted mean or % were calculated by applying the coefficients from the model to all study subjects as if they all had HDHP plan, and as if they all had non-HDHP plan respectively.
